# Supplementary material for: Identification of Four Mouse Diabetes Candidate Genes Altering β-Cell Proliferation
Source: PubMed Central journal article supplement (PMC4562707; doi:10.1371/journal.pgen.1005506), 2015-09-08

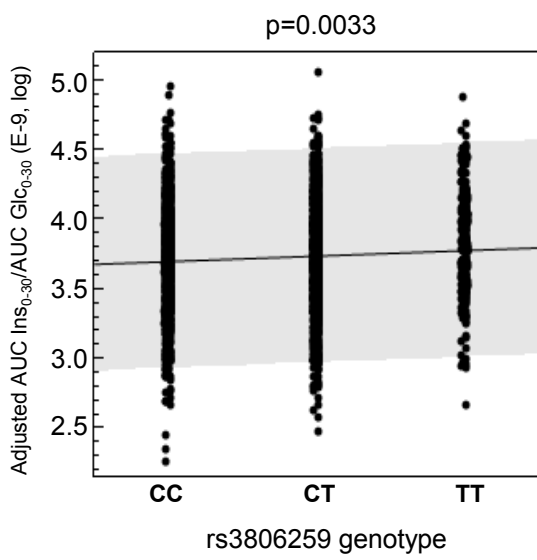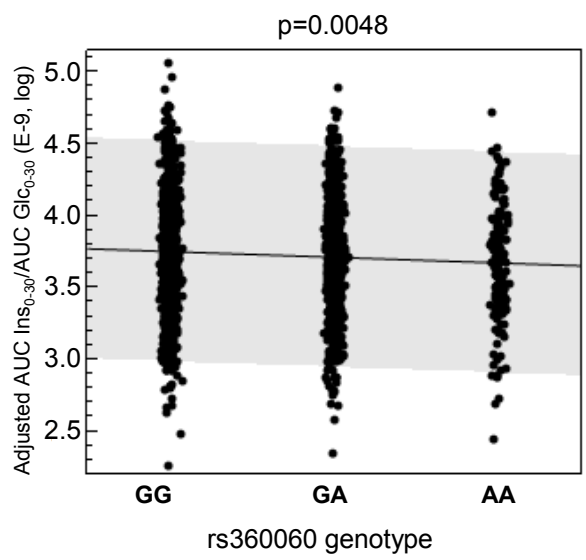

Supplement: pgen.1005506.s002.pdf [file pgen.1005506.s002.pdf]
