# Supplementary material for: Identification of Four Mouse Diabetes Candidate Genes Altering β-Cell Proliferation
Source: PubMed Central journal article supplement (PMC4562707; doi:10.1371/journal.pgen.1005506), 2015-09-08
Supplement: pgen.1005506.s004.pdf [file pgen.1005506.s004.pdf]

**Table S1**

Ingredients of the diets

| Ingredient      | Content (% w/w) |      | Manufacturer                                  |
|-----------------|-----------------|------|-----------------------------------------------|
|                 | -CH             | +CH  |                                               |
| Casein          | 20              | 20   | Bayerische Milchindustrie eG, Landshut        |
| Palm fat        | 33.5            | 13.5 | Ostthüringer Nahrungsmittelwerk, Gera         |
| Safflower oil   | 0.5             | 0.5  | Kunella Feinkost, Cottbus                     |
| Linseed oil     | 0.5             | 0.5  | Kunella Feinkost, Cottbus                     |
| Microcellulose  | 5               | 5    | J. Rettenmaier und Söhne, Ellwangen-Holzmühle |
| Mineral mixture | 5               | 5    | Altromin, Lage                                |
| Vitamin mixture | 2               | 2    | Altromin, Lage                                |
| Sucrose         | 0               | 10   | Pfeifer & Langen KG, Cologne                  |
| Starch          | 0               | 30   | Kröner Stärke, Ibbenbüren                     |

| Macronutrient content             | - CH | + CH |
|-----------------------------------|------|------|
| Total fat (% of total energy)     | 88.5 | 51.4 |
| Carbohydrates (% of total energy) | 0    | 32.4 |
| Protein (% of total energy)       | 11.5 | 16.2 |
| Energy density (kJ/g)             | 29.3 | 21.9 |
